# Supplementary material for: High surface area templated LiFePO4from a single source precursor molecule
Source: Royal Society of Chemistry journal article supplement (doi:10.1039/c0ee00522c), 2010-12-24
Supplement: c0ee00522c.pdf [file c0ee00522c.pdf]

## Supplementary Information for Hill *et al.*

### High surface area templated $\text{LiFePO}_4$ from a single source precursor molecule

Matthew R. Hill, Gregory J. Wilson, Laure Bourgeois and Anthony G. Pandolfo

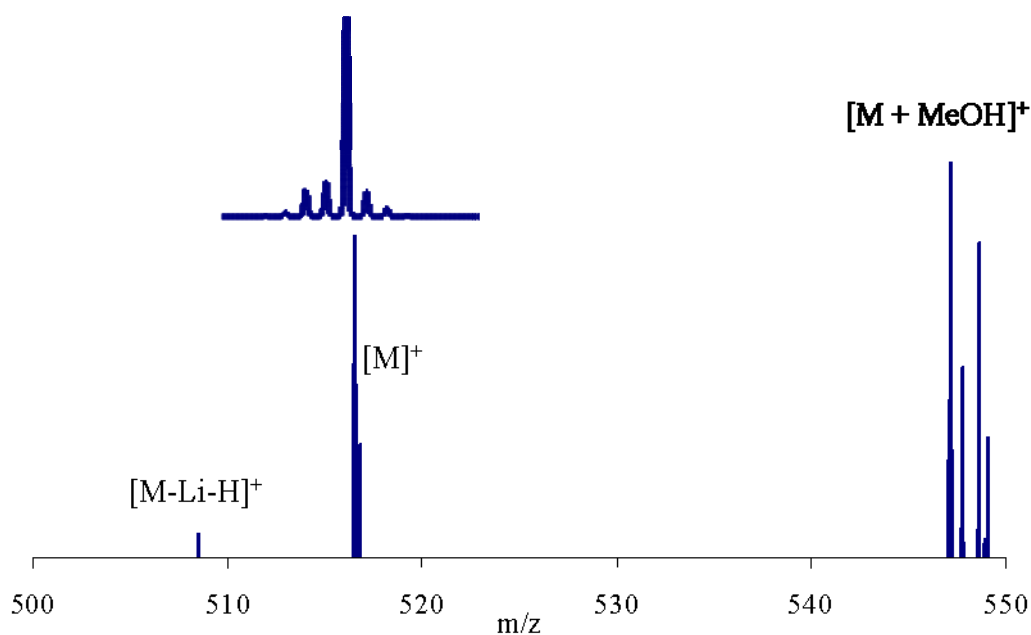

**Figure S1.** Mass spectrum of the single source precursor **LFP-S**. Theoretical splitting pattern (inset), observed splitting pattern (bottom).

Following the successful preparation of a mesoporous  $\text{LiFePO}_4$  / C composite as confirmed from TEM, the potential cathode material was distributed amongst a conductive carbon matrix to prepare the electrode. SEM (**Figure S2**) illustrates the uniform distribution of  $\text{LiFePO}_4$  throughout the carbon matrix.  $\text{LiFePO}_4$  particles (bright regions in SEM micrographs) are 0.5-5  $\mu\text{m}$  in diameter within a thin film of 10  $\mu\text{m}$  uniform thickness.

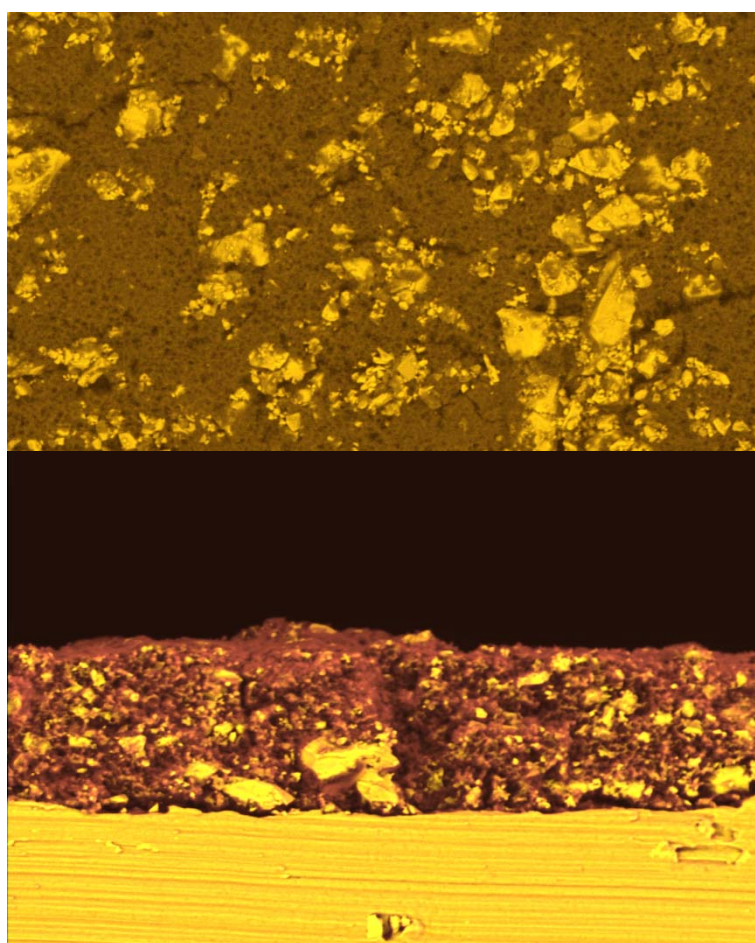

**Figure S2.** Typical SEM images of  $\text{LiFePO}_4$  sample **3** as cast as an electrode. Secondary emission (top) and backscattered electron image (middle) of the same region; an ultramicrotomed cross-section of an electrode coating made from  $\text{LiFePO}_4$  sample **3** (bottom) shows secondary emission overlayed with backscattered electron image of the same region. Bright regions are indicative of  $\text{LiFePO}_4$ .

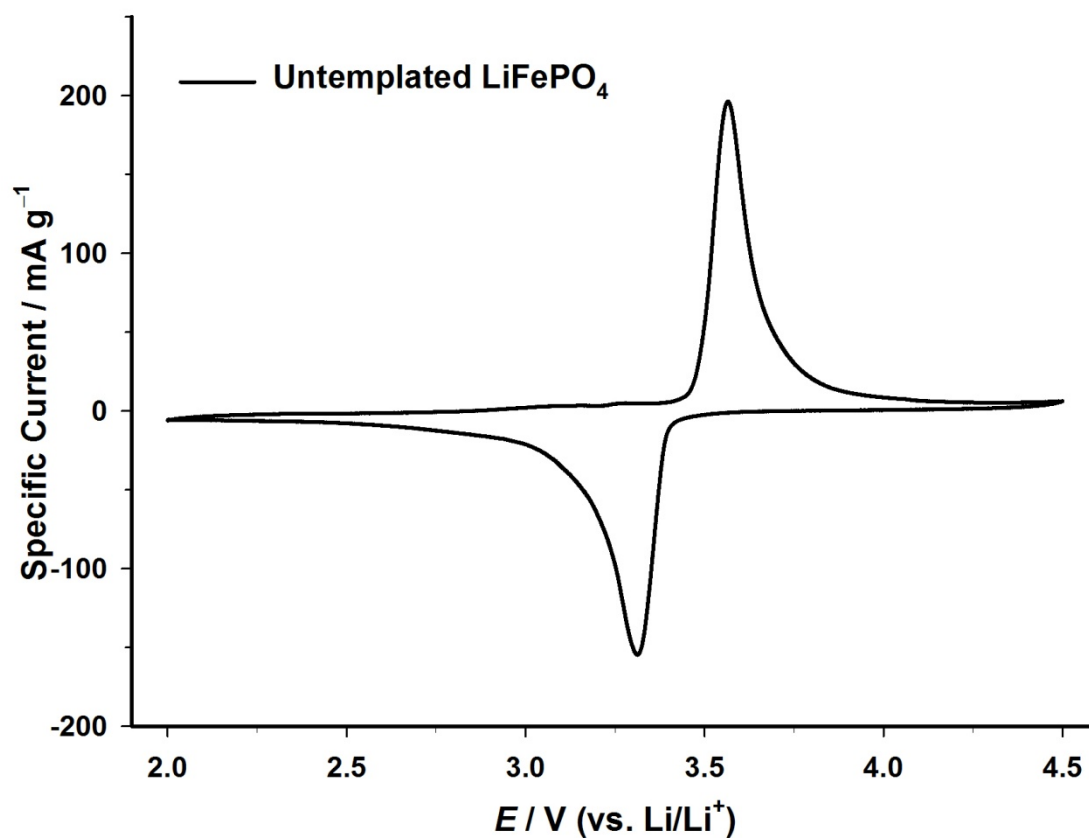

**Figure S3.** Transient cyclic voltammogram expressed as specific current (mA g<sup>-1</sup>) in a two-electrode CR 2032 coin cell for Sample 1 as working electrode, with 1M LiPF<sub>6</sub> (50:50 w/w EC:DMC) electrolyte and Li-metal anode as secondary electrode.
